# Supplementary material
Source: MDPI journal article supplement (https://www.mdpi.com/2073-8994/16/5/565)
Supplement: s1 [file s1]

Table S1: Data of 73 stomata in a 662  $\mu\text{m} \times 444 \mu\text{m}$  micrograph of *Magnolia denudata*

| Code | <i>L</i> ( $\mu\text{m}$ ) | <i>W</i> ( $\mu\text{m}$ ) | <i>A</i> ( $\mu\text{m}^2$ ) | Code | <i>L</i> ( $\mu\text{m}$ ) | <i>W</i> ( $\mu\text{m}$ ) | <i>A</i> ( $\mu\text{m}^2$ ) |
|------|----------------------------|----------------------------|------------------------------|------|----------------------------|----------------------------|------------------------------|
| 1    | 28.28                      | 23.172                     | 530.8                        | 38   | 24.554                     | 19.74                      | 392.6                        |
| 2    | 34.276                     | 19.055                     | 529.03                       | 39   | 31.953                     | 20.811                     | 538.63                       |
| 3    | 38.394                     | 19.318                     | 600.77                       | 40   | 31.236                     | 19.181                     | 485.3                        |
| 4    | 35.746                     | 21.279                     | 616.12                       | 41   | 34.688                     | 20.449                     | 574.56                       |
| 5    | 34.268                     | 19.872                     | 551.59                       | 42   | 30.622                     | 21.981                     | 545.21                       |
| 6    | 34.122                     | 22.494                     | 621.71                       | 43   | 31.337                     | 20.159                     | 511.7                        |
| 7    | 31.576                     | 20.514                     | 524.68                       | 44   | 35.281                     | 21.726                     | 620.88                       |
| 8    | 30.675                     | 19.125                     | 475.19                       | 45   | 29.184                     | 19.055                     | 450.44                       |
| 9    | 32.792                     | 23.102                     | 613.62                       | 46   | 29.732                     | 20.086                     | 483.73                       |
| 10   | 29.725                     | 22.767                     | 548.17                       | 47   | 30.738                     | 18.804                     | 468.18                       |
| 11   | 31.149                     | 21.876                     | 551.95                       | 48   | 27.989                     | 19.486                     | 441.77                       |
| 12   | 31.632                     | 22.458                     | 575.42                       | 49   | 29.729                     | 19.872                     | 478.53                       |
| 13   | 29.218                     | 22.223                     | 525.94                       | 50   | 30.266                     | 23.204                     | 568.86                       |
| 14   | 34.479                     | 20.363                     | 568.7                        | 51   | 31.331                     | 18.716                     | 474.98                       |
| 15   | 32.905                     | 25.04                      | 667.39                       | 52   | 28.954                     | 21.535                     | 505.05                       |
| 16   | 29.38                      | 18.373                     | 437.24                       | 53   | 30.949                     | 21.224                     | 532.06                       |
| 17   | 32.023                     | 21.876                     | 567.43                       | 54   | 30.937                     | 20.394                     | 511.05                       |
| 18   | 32.289                     | 22.386                     | 585.49                       | 55   | 27.239                     | 20.218                     | 446.08                       |
| 19   | 29.493                     | 21.929                     | 523.87                       | 56   | 29.508                     | 19.542                     | 467.08                       |
| 20   | 30.169                     | 19.814                     | 484.19                       | 57   | 31.387                     | 18.949                     | 481.75                       |
| 21   | 35.348                     | 19.244                     | 550.99                       | 58   | 29.182                     | 18.26                      | 431.62                       |
| 22   | 30.334                     | 17.741                     | 435.91                       | 59   | 30.915                     | 18.502                     | 463.31                       |
| 23   | 32.919                     | 22.745                     | 606.48                       | 60   | 31.49                      | 19.414                     | 495.19                       |
| 24   | 32.053                     | 21.504                     | 558.31                       | 61   | 30.283                     | 17.403                     | 426.88                       |
| 25   | 32.628                     | 21.745                     | 574.69                       | 62   | 32.473                     | 23.728                     | 624.12                       |
| 26   | 33.095                     | 21                         | 562.95                       | 63   | 28.656                     | 18.32                      | 425.23                       |
| 27   | 32.023                     | 18.63                      | 483.24                       | 64   | 31.377                     | 19.814                     | 503.58                       |
| 28   | 32.622                     | 23.073                     | 609.68                       | 65   | 28.243                     | 23.032                     | 526.9                        |
| 29   | 29.96                      | 17.801                     | 431.99                       | 66   | 27.611                     | 20.121                     | 450                          |
| 30   | 30.05                      | 20.618                     | 501.85                       | 67   | 30.196                     | 21.233                     | 519.33                       |
| 31   | 32.006                     | 21.929                     | 568.51                       | 68   | 30.248                     | 22.03                      | 539.75                       |
| 32   | 36.443                     | 24.186                     | 713.94                       | 69   | 32.244                     | 21.44                      | 559.96                       |
| 33   | 29.085                     | 19.76                      | 465.52                       | 70   | 30.912                     | 23.202                     | 580.95                       |
| 34   | 31.186                     | 18.257                     | 461.18                       | 71   | 30.283                     | 18.537                     | 454.7                        |
| 35   | 29.892                     | 20.589                     | 498.51                       | 72   | 33.038                     | 22.057                     | 590.26                       |
| 36   | 30.357                     | 22.908                     | 563.29                       | 73   | 34.054                     | 24.48                      | 675.25                       |
| 37   | 32.684                     | 21.523                     | 569.8                        | ---  | ---                        | ---                        | ---                          |

Here, Code is used to distinguish the stomata in the micrograph; *L* is the stomatal length; *W* is the stomatal width; *A* is the stomatal area. *L* and *W* were directly measured using the ImageJ software (<https://imagej.nih.gov/ij/index.html>), and *A* was estimated by  $0.811 LW$ .

**Table S2:** Data of 23 leaves of a bamboo (*Shibataea chinensis*) culm

| <b>Code</b> | <b><i>L</i> (cm)</b> | <b><i>W</i> (cm)</b> | <b><i>A</i> (cm<sup>2</sup>)</b> | <b><i>M</i> (g)</b> |
|-------------|----------------------|----------------------|----------------------------------|---------------------|
| 1           | 9.2422               | 2.3573               | 14.393                           | 0.0739              |
| 2           | 8.8166               | 2.3726               | 14.0038                          | 0.0722              |
| 3           | 8.8125               | 2.2608               | 13.2518                          | 0.0704              |
| 4           | 7.2952               | 1.9698               | 9.4756                           | 0.0496              |
| 5           | 9.1899               | 2.4244               | 14.4798                          | 0.0767              |
| 6           | 7.8789               | 2.1444               | 11.4676                          | 0.0605              |
| 7           | 8.6271               | 2.3033               | 13.0908                          | 0.0666              |
| 8           | 8.3805               | 2.2916               | 12.8387                          | 0.0654              |
| 9           | 8.3993               | 2.2499               | 12.4354                          | 0.0651              |
| 10          | 8.8667               | 2.3739               | 13.6233                          | 0.0683              |
| 11          | 6.182                | 1.8562               | 8.1809                           | 0.0443              |
| 12          | 8.8526               | 2.3543               | 13.0876                          | 0.0674              |
| 13          | 8.5496               | 2.2392               | 12.1307                          | 0.0632              |
| 14          | 7.5679               | 2.0657               | 10.5301                          | 0.0552              |
| 15          | 5.4265               | 1.4736               | 5.3243                           | 0.0265              |
| 16          | 7.3797               | 2.1017               | 9.2872                           | 0.0445              |
| 17          | 9.0953               | 2.4314               | 14.2814                          | 0.0754              |
| 18          | 5.8774               | 1.6614               | 6.7573                           | 0.0351              |
| 19          | 8.618                | 2.3389               | 12.8118                          | 0.0667              |
| 20          | 5.7607               | 1.555                | 5.794                            | 0.0284              |
| 21          | 5.0085               | 1.4609               | 4.8703                           | 0.0226              |
| 22          | 7.4859               | 2.1218               | 9.3174                           | 0.044               |
| 23          | 8.4843               | 2.1721               | 11.8542                          | 0.0579              |

Here, Code is used to distinguish the leaves on the culm; *L* is the leaf lamina length; *W* is the lamina width; *A* is the lamina area; *M* is the lamina dry mass.

**Table S3:** Data of nine tepals of a *Magnolia* × *soulangeana* flower

| <b>Code</b> | <b><i>L</i> (cm)</b> | <b><i>W</i> (cm)</b> | <b><i>A</i> (cm<sup>2</sup>)</b> |
|-------------|----------------------|----------------------|----------------------------------|
| 1           | 10.8897              | 5.9268               | 44.8063                          |
| 2           | 10.2013              | 5.4033               | 39.2375                          |
| 3           | 10.2173              | 5.4787               | 36.7549                          |
| 4           | 10.1231              | 4.8926               | 35.7832                          |
| 5           | 10.6943              | 6.0076               | 43.4086                          |
| 6           | 9.7913               | 5.0407               | 33.5312                          |
| 7           | 9.0225               | 4.7393               | 31.4119                          |
| 8           | 9.8859               | 4.7727               | 34.3423                          |
| 9           | 10.4168              | 5.8714               | 42.8008                          |

Here, Code is used to distinguish the tepals on the flower; *L* is the tepal length; *W* is the tepal width; *A* is the tepal area.

**Table S4:** Volume data of 35 fruits of an individual *Cucumis melo* var. *agrestis* plant

| <b>Code</b> | <b>Volume (cm<sup>3</sup>)</b> | <b>Code</b> | <b>Volume (cm<sup>3</sup>)</b> |
|-------------|--------------------------------|-------------|--------------------------------|
| 1           | 7.5                            | 19          | 11.3                           |
| 2           | 7.8                            | 20          | 9.3                            |
| 3           | 5.9                            | 21          | 11                             |
| 4           | 6.4                            | 22          | 8.3                            |
| 5           | 10                             | 23          | 4.1                            |
| 6           | 9.2                            | 24          | 9.9                            |
| 7           | 8                              | 25          | 7.5                            |
| 8           | 6.8                            | 26          | 5                              |
| 9           | 5.1                            | 27          | 4                              |
| 10          | 1.7                            | 28          | 5.5                            |
| 11          | 4.8                            | 29          | 5                              |
| 12          | 6.1                            | 30          | 3.5                            |
| 13          | 7                              | 31          | 3.9                            |
| 14          | 5.2                            | 32          | 3                              |
| 15          | 6.5                            | 33          | 2.9                            |
| 16          | 8.3                            | 34          | 1.9                            |
| 17          | 8                              | 35          | 1                              |
| 18          | 6.3                            | ---         | ---                            |

Here, Code is used to distinguish the fruits on the plant; Volume is the volume of each fruit using a graduated cylinder with a 3 cm diameter.

Table S5: Length data of 144 seedheads of *Setaria viridis* in a 1 m × 1 m quadrat

| Length (cm) |    |    |    |    |     |
|-------------|----|----|----|----|-----|
| 35          | 35 | 42 | 28 | 58 | 32  |
| 43          | 38 | 27 | 46 | 16 | 10  |
| 45          | 60 | 31 | 40 | 59 | 24  |
| 26          | 49 | 12 | 26 | 24 | 25  |
| 70          | 52 | 13 | 39 | 29 | 31  |
| 65          | 78 | 14 | 29 | 47 | 12  |
| 21          | 42 | 65 | 38 | 36 | 10  |
| 20          | 37 | 17 | 52 | 30 | 28  |
| 45          | 35 | 34 | 17 | 20 | 16  |
| 36          | 44 | 39 | 37 | 38 | 29  |
| 14          | 37 | 20 | 39 | 44 | 75  |
| 45          | 18 | 18 | 49 | 43 | 48  |
| 27          | 12 | 33 | 39 | 54 | 74  |
| 37          | 34 | 45 | 10 | 52 | 20  |
| 25          | 40 | 29 | 37 | 47 | 24  |
| 30          | 47 | 13 | 28 | 38 | 15  |
| 40          | 52 | 17 | 24 | 35 | 20  |
| 40          | 39 | 27 | 47 | 62 | 55  |
| 54          | 28 | 36 | 69 | 65 | 91  |
| 45          | 46 | 16 | 18 | 47 | --- |
| 97          | 94 | 12 | 12 | 25 | --- |
| 50          | 64 | 26 | 17 | 20 | --- |
| 50          | 59 | 25 | 32 | 65 | --- |
| 70          | 39 | 30 | 12 | 75 | --- |
| 42          | 30 | 26 | 27 | 28 | --- |

Here, the study area is located in a field of Baima Experiment Station of Nanjing Forestry University (119° 07'42"E, 31° 37'55" N) in September, 2015. The seedheads of *S. viridis* in the 15 m × 15 m study area were measured, and the study area was divided into 125 quadrats of 1 m × 1 m.

**Table S6:** Breast height diameter data of 81 trees with DBH  $\geq 1$  cm in a 50 m  $\times$  50 m quadrat of a temperate forest

| Scientific Name                                 | DBH (cm) | Scientific Name               | DBH (cm) | Scientific Name           | DBH (cm) |
|-------------------------------------------------|----------|-------------------------------|----------|---------------------------|----------|
| <i>Syringa reticulata</i> var. <i>amurensis</i> | 3.4      | <i>Fraxinus rhynchophylla</i> | 7.6      | <i>Pinus tabuliformis</i> | 11.5     |
| <i>Syringa reticulata</i> var. <i>amurensis</i> | 3.9      | <i>Quercus mongolica</i>      | 2.7      | <i>Pinus tabuliformis</i> | 12.3     |
| <i>Syringa reticulata</i> var. <i>amurensis</i> | 4.3      | <i>Quercus mongolica</i>      | 4.5      | <i>Pinus tabuliformis</i> | 12.6     |
| <i>Syringa reticulata</i> var. <i>amurensis</i> | 4.3      | <i>Quercus mongolica</i>      | 5.6      | <i>Pinus tabuliformis</i> | 12.7     |
| <i>Syringa reticulata</i> var. <i>amurensis</i> | 4.5      | <i>Armeniaca sibirica</i>     | 3.7      | <i>Pinus tabuliformis</i> | 13       |
| <i>Syringa reticulata</i> var. <i>amurensis</i> | 4.7      | <i>Armeniaca sibirica</i>     | 7.1      | <i>Pinus tabuliformis</i> | 13.3     |
| <i>Syringa reticulata</i> var. <i>amurensis</i> | 6.6      | <i>Pinus tabuliformis</i>     | 3.8      | <i>Pinus tabuliformis</i> | 13.3     |
| <i>Syringa reticulata</i> var. <i>amurensis</i> | 6.9      | <i>Pinus tabuliformis</i>     | 4.2      | <i>Pinus tabuliformis</i> | 13.7     |
| <i>Syringa reticulata</i> var. <i>amurensis</i> | 7        | <i>Pinus tabuliformis</i>     | 4.8      | <i>Pinus tabuliformis</i> | 13.7     |
| <i>Syringa reticulata</i> var. <i>amurensis</i> | 7.9      | <i>Pinus tabuliformis</i>     | 5.7      | <i>Pinus tabuliformis</i> | 14.1     |
| <i>Syringa reticulata</i> var. <i>amurensis</i> | 8.6      | <i>Pinus tabuliformis</i>     | 6.1      | <i>Pinus tabuliformis</i> | 14.6     |
| <i>Syringa reticulata</i> var. <i>amurensis</i> | 8.6      | <i>Pinus tabuliformis</i>     | 6.1      | <i>Pinus tabuliformis</i> | 14.9     |
| <i>Syringa reticulata</i> var. <i>amurensis</i> | 9        | <i>Pinus tabuliformis</i>     | 6.2      | <i>Pinus tabuliformis</i> | 15       |
| <i>Syringa reticulata</i> var. <i>amurensis</i> | 9.8      | <i>Pinus tabuliformis</i>     | 6.3      | <i>Pinus tabuliformis</i> | 15.6     |
| <i>Syringa reticulata</i> var. <i>amurensis</i> | 9.9      | <i>Pinus tabuliformis</i>     | 7.7      | <i>Pinus tabuliformis</i> | 15.6     |
| <i>Syringa reticulata</i> var. <i>amurensis</i> | 10.2     | <i>Pinus tabuliformis</i>     | 7.7      | <i>Pinus tabuliformis</i> | 16.1     |
| <i>Syringa reticulata</i> var. <i>amurensis</i> | 10.3     | <i>Pinus tabuliformis</i>     | 8        | <i>Pinus tabuliformis</i> | 16.6     |
| <i>Syringa reticulata</i> var. <i>amurensis</i> | 12.1     | <i>Pinus tabuliformis</i>     | 8.4      | <i>Pinus tabuliformis</i> | 16.7     |
| <i>Syringa reticulata</i> var. <i>amurensis</i> | 13       | <i>Pinus tabuliformis</i>     | 8.4      | <i>Pinus tabuliformis</i> | 17.4     |
| <i>Syringa reticulata</i> var. <i>amurensis</i> | 13.6     | <i>Pinus tabuliformis</i>     | 9.1      | <i>Pinus tabuliformis</i> | 17.7     |
| <i>Syringa reticulata</i> var. <i>amurensis</i> | 16       | <i>Pinus tabuliformis</i>     | 9.5      | <i>Pinus tabuliformis</i> | 20.6     |

|                                                    |      |                           |      |                                     |      |
|----------------------------------------------------|------|---------------------------|------|-------------------------------------|------|
| <i>Syringa reticulata</i> var.<br><i>amurensis</i> | 17   | <i>Pinus tabuliformis</i> | 10.2 | <i>Pinus</i><br><i>tabuliformis</i> | 22.5 |
| <i>Syringa pekinensis</i>                          | 12.1 | <i>Pinus tabuliformis</i> | 10.2 | <i>Ulmus pumila</i>                 | 3.5  |
| <i>Fraxinus rhynchophylla</i>                      | 2.7  | <i>Pinus tabuliformis</i> | 10.3 | <i>Ulmus pumila</i>                 | 4    |
| <i>Fraxinus rhynchophylla</i>                      | 4.9  | <i>Pinus tabuliformis</i> | 10.8 | <i>Ulmus pumila</i>                 | 4    |
| <i>Fraxinus rhynchophylla</i>                      | 5.4  | <i>Pinus tabuliformis</i> | 10.9 | <i>Ulmus pumila</i>                 | 5.7  |
| <i>Fraxinus rhynchophylla</i>                      | 6.4  | <i>Pinus tabuliformis</i> | 11   | <i>Ulmus pumila</i>                 | 7.9  |
